# Supplementary material for: Reasons for Removal of Miniplates Used in Fixation of Maxillofacial Bone Fractures: Systematic Review and Meta-Analysis
Source: Preprints.org preprint supplement (doi:10.20944/preprints202309.1497.v1), 2023-09-22
Supplement: Supplementary file 1 [file Figure%202%20and%203.pdf]

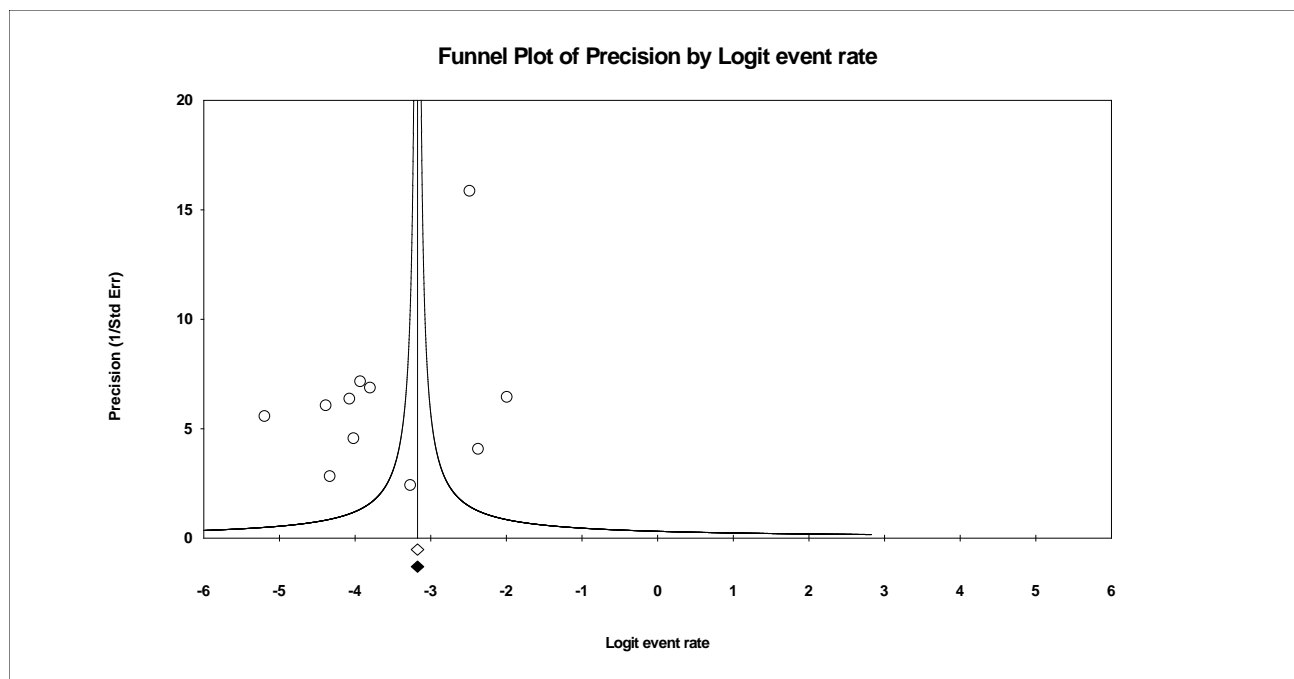

**Figure 2.** Funnel Plot for all combined studies included in the meta-analysis

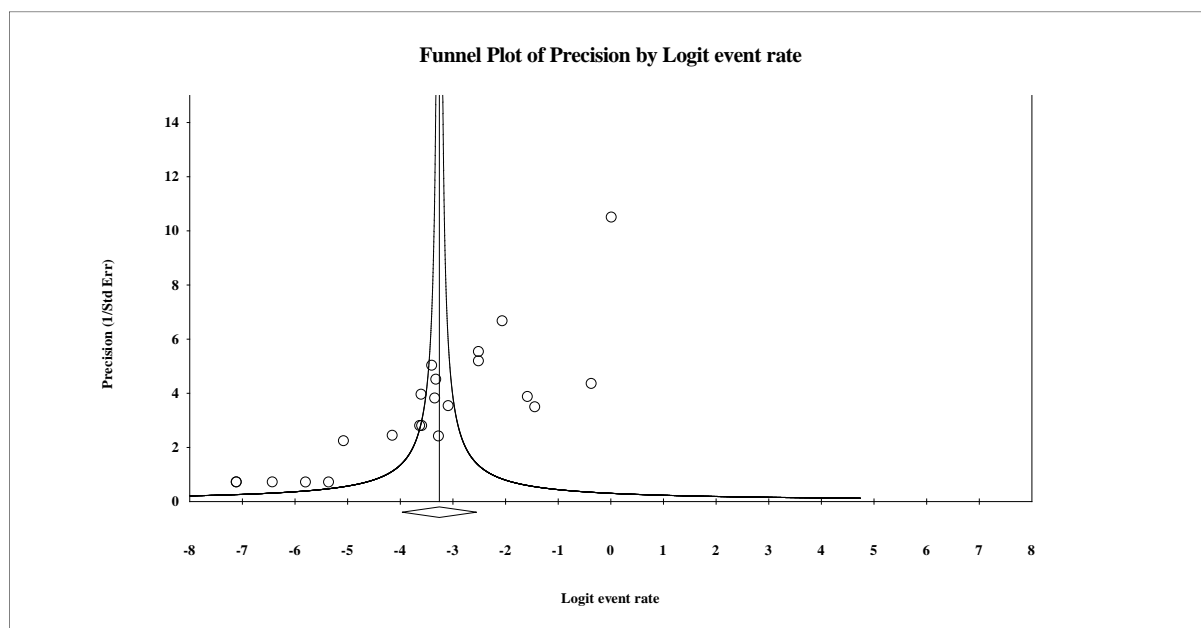

**Figure 3.** Funnel Plot for studies included in the meta-analysis based on site of removal
