# Supplementary material for: Reasons for Removal of Miniplates Used in Fixation of Maxillofacial Bone Fractures: Systematic Review and Meta-Analysis
Source: Preprints.org preprint supplement (doi:10.20944/preprints202309.1497.v1), 2023-09-22
Supplement: Supplementary file 2 [file Tables1-4%2005%20Aug%20023.pdf]

**Table 1. Risk of Bias**

| Author/Year           | Objective of study | Inclusion/Exclusion Criteria | Study Design | Data source | Reasons for plating | Site of plating | Reasons for plate removal | Statistical methods | Summary results | Follow-Up | Study limitations | Risk of Bias |
|-----------------------|--------------------|------------------------------|--------------|-------------|---------------------|-----------------|---------------------------|---------------------|-----------------|-----------|-------------------|--------------|
| Brown et al, 1989     | X                  | X                            | X            | X           | X                   | X               | X                         | X                   | X               | X         |                   | 10           |
| Islamoglu et al, 2002 | X                  |                              | X            |             | X                   | X               | X                         |                     | X               | X         |                   | 7            |
| Murthy et al, 2005    | X                  |                              | X            | X           | X                   | X               | X                         |                     | X               | X         |                   | 8            |
| Rallis et al, 2006    | X                  |                              | X            | X           | X                   | X               | X                         |                     | X               | X         |                   | 8            |
| Dae-Kyun et al, 2007  | X                  | X                            | X            | X           | X                   |                 | X                         | X                   | X               | X         |                   | 9            |
| O'Connell et al, 2009 | X                  |                              | X            | X           | X                   | X               | X                         |                     | X               | X         |                   | 8            |
| Pan et al, 2013       | X                  | X                            | X            | X           | X                   | X               | X                         | X                   | X               | X         | X                 | 11           |
| Liandro et al, 2015   | X                  | X                            | X            | X           | X                   | X               | X                         |                     | X               | X         |                   | 9            |
| Gorrela et al, 2019   | X                  |                              | X            | X           | X                   | X               | X                         |                     | X               | X         |                   | 8            |
| Sukegawa et al, 2020  | X                  | X                            | X            | X           | X                   | X               | X                         | X                   | X               | X         | X                 | 11           |
| Sadiq et al, 2021     | X                  |                              | X            | X           | X                   | X               | X                         |                     | X               | X         |                   | 8            |

**Table 2. Characteristics of the selected studies**

| Author/<br>Year          | Country | # of<br>pts | Age<br>range<br>(yrs) | M:F<br>ratio    | Site of plate<br>placement                                                                                                                                                                                                                                                                                                                       | Type of<br>plates   | # of<br>plates | Surgical<br>approach   | Reasons for plate<br>removal                                                                                                                                                                                                                                                                                            | Duration<br>Between<br>insertion &<br>removal | Site of plate<br>removal                                                                                                                     |
|--------------------------|---------|-------------|-----------------------|-----------------|--------------------------------------------------------------------------------------------------------------------------------------------------------------------------------------------------------------------------------------------------------------------------------------------------------------------------------------------------|---------------------|----------------|------------------------|-------------------------------------------------------------------------------------------------------------------------------------------------------------------------------------------------------------------------------------------------------------------------------------------------------------------------|-----------------------------------------------|----------------------------------------------------------------------------------------------------------------------------------------------|
| O'Connell et<br>al, 2009 | Ireland | 434         | 3-72                  | 4:1             | <ul style="list-style-type: none"> <li>• Mandible,</li> <li>• Orbito-zygomatic complex,</li> <li>• Maxilla</li> </ul>                                                                                                                                                                                                                            | Titanium miniplates | 800            | Intraoral              | <ul style="list-style-type: none"> <li>• Infection,</li> <li>• Tooth extraction</li> <li>• Plate exposure,</li> <li>• Fibrous union,</li> <li>• Temperature</li> <li>• Plate fracture,</li> <li>• Implant placement,</li> <li>• Prior to ortho surg,</li> <li>• Palpable plate,</li> <li>• Pediatric patient</li> </ul> | 2.5-68 mon<br><br>average:19m                 | <ul style="list-style-type: none"> <li>• Le Fort I</li> <li>• Le Fort II</li> <li>• Zygomatic complex</li> </ul>                             |
| Brown et al,<br>1989     | UK      | 62          | 15-80                 | -               | <ul style="list-style-type: none"> <li>• Mandible</li> <li>• Ramus</li> <li>• Angle</li> <li>• Mental/Symphysis</li> <li>• Maxilla &amp; midface</li> <li>• Buttress</li> <li>• Piriform fossa</li> </ul>                                                                                                                                        | Stainless steel     | 105            | Intraoral              | <ul style="list-style-type: none"> <li>• Infection, Pain</li> </ul>                                                                                                                                                                                                                                                     | 3 - 24months                                  |                                                                                                                                              |
| Islamoglu et<br>al,2002  | Turkey  | 66          | 6-64                  | 51:15<br>(17:5) | <u>Mandible</u> <ul style="list-style-type: none"> <li>• Symphysis</li> <li>• Body</li> <li>• Angle</li> </ul> <u>Maxilla &amp; midface</u> <ul style="list-style-type: none"> <li>• Le Fort I</li> <li>• Le Fort II</li> <li>• Le Fort III</li> <li>• Inferior orbital rim</li> <li>• Zygomatic complex</li> <li>• Zygomaticofrontal</li> </ul> | Titanium            | 296            | Intraoral<br>Extraoral | <ul style="list-style-type: none"> <li>• Infection,</li> <li>• Extrusion,</li> <li>• Facial deformity,</li> <li>• Pain,</li> <li>• Malunion,</li> <li>• Plate fracture.</li> </ul>                                                                                                                                      | 3-14 months                                   |                                                                                                                                              |
| Llandro et<br>al, 2015   | UK      | 216         | 17-69                 | 91:9            | <ul style="list-style-type: none"> <li>• Zygomatic-complex</li> </ul>                                                                                                                                                                                                                                                                            | Titanium            | 307            | Intraoral<br>extraoral | <ul style="list-style-type: none"> <li>• Infection,</li> <li>• Exposure</li> </ul>                                                                                                                                                                                                                                      | 111-972 days<br>180 days                      | <ul style="list-style-type: none"> <li>• Zygomatic complex</li> </ul>                                                                        |
| Murthy et<br>al, 2005    | USA     | 76          | 14-71                 | 62:14<br>(31:7) | <u>Mandible</u> <ul style="list-style-type: none"> <li>• Ramus</li> <li>• Angle</li> <li>• Body</li> <li>• Symphysis</li> </ul> <u>Maxilla &amp; midface</u>                                                                                                                                                                                     | Titanium            | 163            | Intraoral<br>extraoral | <ul style="list-style-type: none"> <li>• Infection</li> </ul>                                                                                                                                                                                                                                                           | No average                                    | <ul style="list-style-type: none"> <li>• Panfacial</li> <li>• Midface</li> <li>• Zygoma</li> <li>• Blowout</li> <li>• Mand. angle</li> </ul> |

|                    |              |     |       |               |                                                                                                                                                                                                                                                                                                                                                                                                                                             |          |     |                     |                                                                                                                                                                                                                                                                                                                  |                                        |                                                                                                                                            |
|--------------------|--------------|-----|-------|---------------|---------------------------------------------------------------------------------------------------------------------------------------------------------------------------------------------------------------------------------------------------------------------------------------------------------------------------------------------------------------------------------------------------------------------------------------------|----------|-----|---------------------|------------------------------------------------------------------------------------------------------------------------------------------------------------------------------------------------------------------------------------------------------------------------------------------------------------------|----------------------------------------|--------------------------------------------------------------------------------------------------------------------------------------------|
|                    |              |     |       |               | <ul style="list-style-type: none"><li>• Frontal</li><li>• Nasal</li><li>• Frontozygomatic</li><li>• Zygoma</li><li>• Infraorbital rim</li><li>• Piriform area</li><li>• Zygomatic buttress</li></ul>                                                                                                                                                                                                                                        |          |     |                     |                                                                                                                                                                                                                                                                                                                  |                                        | <ul style="list-style-type: none"><li>• Mand. ramus</li><li>• Mand. symphysis</li></ul>                                                    |
| Pan et al, 2013    | China /India | 156 | 12-60 | 128:28 (32:7) | Mandibular <ul style="list-style-type: none"><li>•Body</li><li>•Symphysis/parasym</li><li>•Angle</li><li>•Condyle</li></ul> Maxilla & midface <ul style="list-style-type: none"><li>• Zygomatic buttress</li><li>Frontozygomatic</li><li>• Infraorbital rim</li><li>• NOE/frontal bone</li><li>• Pyriform aperture</li></ul>                                                                                                                | Titanium | 384 | Intraoral extraoral | <ul style="list-style-type: none"><li>• Infection</li><li>• wound dehiscence,</li><li>• Reconstruction</li><li>• Growth,</li><li>• Plate exposure,</li><li>• Pain,</li><li>• Palpable plates,</li><li>• Heat/cold</li><li>• Dental or nerve damage,</li><li>• Broken hardware,</li><li>• Prosthodontic</li></ul> | 0-36 months                            | <ul style="list-style-type: none"><li>• Mandibular fracture</li><li>• ZMC</li><li>• Maxillary</li><li>• Frontal bone/NOE complex</li></ul> |
| Rallis et al, 2006 | Greece       | 280 | 17-75 | 20:7          | <u>Maxilla &amp; midface</u> <ul style="list-style-type: none"><li>•Frontal bone</li><li>•Frontozygomatic</li><li>•Frontonasal suture</li><li>•Infraorbital rim</li><li>•Zygomatic arch</li><li>•Anterior wall of the antrum</li><li>• Zygomatic buttress</li></ul> Mandible <ul style="list-style-type: none"><li>• Ramus + condyle</li><li>• Ext oblique ridge</li><li>• Angle</li><li>• Body of mandible</li><li>• Mental area</li></ul> | Titanium | 599 | Extraoral           | <ul style="list-style-type: none"><li>• Infection,</li><li>• Exposure,</li><li>• Patient's request, Palpation,</li><li>• Re-operation,</li><li>• Nonunion,</li><li>• Plate displacement</li></ul>                                                                                                                | 0.5 - 36 months<br>Average 11.5 months |                                                                                                                                            |

|                      |          |      |            |                  |                                                                                                                                                                                                                                                                                                                                  |                     |      |                         |                                                                                                                                                                                                                                                                                                                 |                     |                                                                                                                                                                           |
|----------------------|----------|------|------------|------------------|----------------------------------------------------------------------------------------------------------------------------------------------------------------------------------------------------------------------------------------------------------------------------------------------------------------------------------|---------------------|------|-------------------------|-----------------------------------------------------------------------------------------------------------------------------------------------------------------------------------------------------------------------------------------------------------------------------------------------------------------|---------------------|---------------------------------------------------------------------------------------------------------------------------------------------------------------------------|
| Sukegawa et al, 2020 | Japan    | 158  | 8-91       | 112:46<br>(56:2) | Maxilla & midface <ul style="list-style-type: none"> <li>• Zygomatic buttress</li> <li>• Pyriform aperture</li> <li>• Infraorbital rim</li> <li>• Frontozygomatic</li> </ul> Mandible <ul style="list-style-type: none"> <li>• Condyle</li> <li>• Symphysis</li> <li>• Angle</li> <li>• Parasymphysis</li> <li>• Body</li> </ul> | Titanium            | 440  | Intraoral and extraoral | <ul style="list-style-type: none"> <li>• Infection</li> <li>• wound dehiscence</li> <li>• Plate exposure,</li> <li>• Broken hardware,</li> <li>• Palpable plates,</li> <li>• Screw loosening,</li> <li>• Patient's request,</li> <li>• Growth,</li> <li>• Teeth extraction,</li> <li>• Prosthodontic</li> </ul> | 258 days            | Maxilla & midface<br>Zygomatic buttress<br>Pyriform aperture<br>Infraorbital rim<br>Frontozygomatic<br>Mandible<br>Condyle<br>Symphysis<br>Angle<br>Parasymphysis<br>Body |
| Gorrela et al, 2019  | India    | 234  | 14-59      | 172:62<br>(86:3) | <u>Mandible</u> <ul style="list-style-type: none"> <li>• Parasymphysis</li> <li>• Angle</li> <li>• Condyle</li> <li>• Body</li> </ul> Maxilla & zygomatic complex                                                                                                                                                                | Stainless steel     | 437  | Intraoral               | <ul style="list-style-type: none"> <li>• Infection</li> <li>• Dehiscence</li> <li>• Loose plates</li> <li>• Palpable plates</li> <li>• Patient request</li> <li>• Non-union</li> </ul>                                                                                                                          |                     | -                                                                                                                                                                         |
| Dae-Kyun et al, 2007 | Korea    | 419  | Mean: 41.4 | 340:79           |                                                                                                                                                                                                                                                                                                                                  | Titanium Absorbable | 609  | Intraoral               | <ul style="list-style-type: none"> <li>• Infection</li> <li>• dehiscence</li> <li>• Palpable</li> <li>• Patients preference</li> <li>• 2<sup>nd</sup> operation</li> </ul>                                                                                                                                      | <3 months- >3 years | Cranial<br>Facial<br>Mandibular<br>Combined                                                                                                                               |
| Sadiq et al, 2021    | Pakistan | 139  | 21-63      | 30:2<br>(15:1)   | <u>Mandible</u> <ul style="list-style-type: none"> <li>• Angle</li> <li>• Symphysis</li> <li>• Parasymphysis</li> <li>• Body</li> <li>• Condyle</li> </ul> <u>Maxilla &amp; midface</u> <ul style="list-style-type: none"> <li>• Zygomaxilla</li> <li>• Frontozygomatic</li> <li>• Body</li> <li>• Arch</li> </ul>               | Titanium            | 78   | Intraoral<br>Extraoral  | <ul style="list-style-type: none"> <li>• Infection</li> <li>• Sensitivity + pain</li> <li>• Palpability</li> <li>• Fracture of plate</li> <li>• Cancer phobia</li> </ul>                                                                                                                                        | 3-36 months         | -                                                                                                                                                                         |
| Total                | -        | 2240 | 6-91       |                  | -                                                                                                                                                                                                                                                                                                                                | -                   | 4218 | -                       | -                                                                                                                                                                                                                                                                                                               | 0.5 months->3 yrs   | -                                                                                                                                                                         |

**Table 3. location and indications for plate removal**

| Author/Year               | Number of plates | Indications for plate removal |                  |                |                           |      |                |                |                       |                      |                                                                                         | Total No (%)     |
|---------------------------|------------------|-------------------------------|------------------|----------------|---------------------------|------|----------------|----------------|-----------------------|----------------------|-----------------------------------------------------------------------------------------|------------------|
|                           |                  | Infection                     | Tooth Extraction | Plate exposure | Prosthetic rehabilitation | Pain | Plate fracture | Palpable plate | Loose fixation device | Patients preference. | Other reasons                                                                           |                  |
| Brown et al, 1989         | 105              | 14                            | -                | -              | -                         | 4    | -              | -              | -                     | -                    | -                                                                                       | N= 18<br>17.14%  |
| Islamoglu et al, 2002     | 296              | 6                             | -                | -              | -                         | 3    | 1              | -              | -                     | -                    | Malunion: 2<br>Extrusion: 5<br>Facial deformity: 4                                      | N= 21<br>7.095%  |
| Murthy et al, 2005        | 163              | 6                             | -                | -              | -                         | -    | -              | -              | -                     | -                    | -                                                                                       | N= 6<br>3.680%   |
| George Rallis et al, 2006 | 599              | 9                             | -                | 8              | -                         | -    | -              | 7              | -                     | 8                    | Re-operation: 2<br>Non-union: 2<br>Plate displaced: 1                                   | N= 37<br>6.18%   |
| Dae-Kyun et al, 2007      | 609              | 26                            | -                | -              | -                         | -    | -              | 5              | -                     | 4                    | 2 <sup>nd</sup> operation - 6                                                           | N= 41<br>6.73%   |
| O'Connell et al, 2009     | 800              | 12                            | 7                | 2              | 2                         | -    | 1              | 1              | -                     | -                    | Fibrous union: 2<br>Temp conduction: 1<br>Prior to orthg. surgery: 1<br>Peds patient: 2 | N= 31<br>3.88%   |
| Pan et al, 2013           | 384              | 16                            | -                | 1              | 6                         | 6    | -              | 1              | -                     | -                    | Cold intolerance: 1<br>Plate Failure: 2<br>Dental/nerve damage: 2                       | N= 35<br>9.11%   |
| Llandro et al, 2015       | 307              | 3                             | -                | 5              | -                         | -    | -              | -              | -                     | -                    | -                                                                                       | N= 8<br>2.60%    |
| Gorrela et al, 2019       | 437              | 15                            | -                | -              | -                         | -    | -              | 5              | 8                     | 5                    | Wound Dehiscence – 12<br>Non-union – 3                                                  | N= 48<br>10.98%  |
| Sukegawa et al, 2020      | 440              | 12                            | 39               | 2              | 6                         | -    | -              | 4              | 6                     | 199                  | Growth facilitation: 3<br>Unknown – 1 (not presented)                                   | N= 272<br>61.81% |
| Sadiq Ali et al, 2021     | 78               | 20                            | -                | -              | -                         | 14   | 2              | 8              | -                     | -                    | Cancer phobia - 3                                                                       | N= 47<br>60.26%  |
| Total                     | 4218             | 139                           | 46               | 18             | 14                        | 27   | 4              | 31             | 14                    | 216                  | 55                                                                                      | 564              |

**Table 4. Number and locations of miniplates placed and removed**

| Author/<br>Year             | No & % of miniplates<br>placed<br>(maxilla& mandible) | No & % of miniplates<br>removed<br>(maxilla& mandible) | No & location of<br>miniplates placed in<br>mandible                                                       | No & location of miniplates<br>removed from mandible<br>No (%)                                           | No & Location of<br>miniplates placed (maxilla<br>and zygoma)                                                                                                                 | Location of miniplates<br>removed from maxilla<br>No (%)                                                                                                            |
|-----------------------------|-------------------------------------------------------|--------------------------------------------------------|------------------------------------------------------------------------------------------------------------|----------------------------------------------------------------------------------------------------------|-------------------------------------------------------------------------------------------------------------------------------------------------------------------------------|---------------------------------------------------------------------------------------------------------------------------------------------------------------------|
| Brown et al,<br>1989        | 105                                                   | 18 (17.14%)                                            | Angle - 29<br>Mental area - 21<br>Symphysis - 46<br>Ramus – 2<br>Total= 98                                 | Angle- 2<br>Mental area- 6<br>Symphysis- 10<br>Ramus - 0<br>otal= 18 (17.14%)                            | Zygomatic Buttress - 5<br>Piriform fossa- 2<br><br>Total=7                                                                                                                    | Zygomatic Buttress - 0<br>Piriform fossa- 0<br><br>Total= 0                                                                                                         |
| Islamoglu et<br>al,<br>2002 | 296                                                   | 21 (7.09%)                                             | Body - 56<br>Symphysis - 20<br>Angle – 22<br><br>Total=98                                                  | Body- 3<br>Symphysis- 10<br>Angle – 0<br><br>Total= 13 (4.39%)                                           | Maxillary - 96<br>Other - 102<br>Inferior orbital rim<br>Zygomatic region<br>Total=198                                                                                        | Maxilla- 8<br>Other-0<br><br>Total= 8 (2.70%)                                                                                                                       |
| Murthy et al,<br>2005       | 163                                                   | 6 (3.68%)                                              | Mand ramus - 6<br>Mand angle - 15<br>Mand body - 7<br>Mand symphysis – 25<br><br>Total=53                  | Mand ramus- 0<br>Mand angle - 3<br>Mand body- 0<br>Mand symphysis – 3<br><br>Total=6 (3.68%)             | Frontal - 4<br>Nasal - 8<br>Frontozyg suture - 30<br>Zygoma - 4<br>Infraorbital rim - 23<br>Piriform area - 10<br>Zyg maxillary buttress – 31<br>Total= 110                   | Frontal -<br>Nasal -<br>Frontozyg suture -<br>Zygoma -<br>Infraorbital rim -<br>Piriform area -<br>Zyg maxillary buttress –<br>Total=0                              |
| Rallis et al,<br>2006       | 599                                                   | 37 (6.18%)                                             | Asc ramus - 28<br>Ext oblique ridge - 22<br>Angle - 16<br>Body - 68<br>Mental area – 169<br><br>Total= 303 | Asc ramus –<br>Ext oblique ridge - 3<br>Angle - 1<br>Body - 9<br>Mental area – 8<br><br>Total=21 (3.50%) | Frontal - 8<br>Frontozyg suture - 129<br>Frontonasal suture - 6<br>Infraorbital rim - 73<br>Zygomatic arch - 1<br>Ant. wall of antrum - 39<br>Zyg buttress – 40<br>Total= 296 | Frontal –<br>Frontozyg suture - 2<br>Frontonasal - 2<br>Infraorbital rim - 4<br>Zygomatic arch-<br>Ant. wall of antrum - 6<br>Zyg buttress – 2<br>Total= 16 (2.67%) |
| Dae-Kyun et<br>al, 2007     | 609                                                   | 41 (6.73%)                                             | Mandible = 222                                                                                             | Mandible = 11 (1.8%)                                                                                     | Maxilla = 387                                                                                                                                                                 | Maxilla = 30 (4.93%)                                                                                                                                                |
| O'Connell et<br>al,<br>2009 | 800                                                   | 31 (3.88%)                                             | Mandible – 402                                                                                             | Mandible – 26<br><br>Total 26 (3.25%)                                                                    | Maxilla – 92<br>Orbitozygomatic – 306<br>Total= 398                                                                                                                           | Maxilla – 3<br>Orbitozygomatic – 2<br>Total= 5 (0.63%)                                                                                                              |

|                            |             |                     |                                                                                              |                                                                                                       |                                                                                                                                          |                                                                                                                                     |
|----------------------------|-------------|---------------------|----------------------------------------------------------------------------------------------|-------------------------------------------------------------------------------------------------------|------------------------------------------------------------------------------------------------------------------------------------------|-------------------------------------------------------------------------------------------------------------------------------------|
| Pan et al,<br>2013         | 384         | 35 (9.11%)          | Body - 92<br>Symph/parasymph75<br>Angle - 38<br>Condyle – 31<br><br>Total=236                | Body - 15<br>Symphysis/parasymphysis- 12<br>Angle - 1<br>Condyle – 1<br><br>Total=29 (7.55%)          | Zygomatic buttress - 44<br>Frontozygomatic - 33<br>Infraorbital rim - 42<br>NOE/frontal bone - 14<br>Piriform aperture – 15<br>Total=148 | Zygomatic buttress - 2<br>Frontozygomatic- 2<br>Infraorbital rim – 2<br>NOE/frontal bone -<br>Piriform aperture-<br>Total=6 (1.56%) |
| Llandro et al,<br>2015     | 307         | 8 (2.61%)           | -                                                                                            | -                                                                                                     | Buttress – 192<br>Zygomatico frontal – 86<br>Infraorbital – 28<br>Left zygomatic arch – 1<br>Total= 307                                  | Buttress – 7<br>Zygomatico frontal –<br>Infraorbital – 1<br>Left zygomatic arch –<br>Total= 8 (2.61%)                               |
| Gorrela et al,<br>2019     | 437         | 48 (10.98%)         | Para symphysis - 126<br>Angle - 52<br>Condyle - 25<br>Body – 42<br>Total=245                 | Para symphysis - 12<br>Angle - 12<br>Condyle –<br>Body – 9<br>Total=33 (7.50%)                        | Maxilla - 140<br>Zygomatic complex - 52<br><br>Total= 192                                                                                | Maxilla – 6<br>Zygomatic complex - 9<br><br>Total=15 (3.43%)                                                                        |
| Sukegawa et<br>al,<br>2020 | 440         | 272 (61.82%)        | Condyle - 98<br>Symphysis - 79<br>Angle - 62<br>Parasymphysis - 48<br>Body – 30<br>Total=317 | Condyle - 59<br>Symphysis - 59<br>Angle - 53<br>Parasymphysis - 37<br>Body – 14<br>Total=222 (50.45%) | Zygomatic buttress - 41<br>Piriform aperture - 34<br>Infraorbital rim - 30<br>Frontozygomatic – 18<br><br>Total= 123                     | Zygomatic buttress - 22<br>Piriform aperture - 20<br>Infraorbital rim - 3<br>Frontozygomatic – 5<br><br>Total=50 (11.36%)           |
| Sadiq et al,<br>2021       | 78          | 47 (60.26%)         | Angle – 21<br>Symphysis – 15<br>Parasymphysis – 7<br>Body – 8<br>Condyle – 4<br>Total= 55    | Angle – 16<br>Symphysis – 8<br>Parasymphysis – 4<br>Body – 3<br>Condyle – 1<br>Total= 32 (41.0%)      | Maxilla – 7<br>Zygoma – 16<br><br>Total= 23                                                                                              | Maxilla – 6<br>Zygoma – 9<br><br>Total=15 (19.2%)                                                                                   |
| <b>Total</b>               | <b>4218</b> | <b>564 (13.37%)</b> | <b>2029</b>                                                                                  | <b>411</b>                                                                                            | <b>2189</b>                                                                                                                              | <b>153</b>                                                                                                                          |
